# Supplementary material for: A Volumetric Analysis of the 1H NMR Chemical Shielding in Supramolecular Systems
Source: MDPI journal article supplement (doi:10.3390/ijms22073333), 2021-03-24

Supplementary Information to “A Volumetric Analysis of the  $^1\text{H}$  NMR  
Chemical Shielding in Supramolecular Systems” by Czernek & Brus

(*IJMS* 2021)

Table S1. Experimental,  $\delta$ , and theoretical,  $\epsilon$ , chemical shifts (in ppm) plotted in Figure 1 of the main text.

| HETCOR pair # | HETCOR pair designation | $\delta$ ( $^{13}\text{C}$ ) | $\epsilon$ ( $^{13}\text{C}$ ) | $\delta$ ( $^1\text{H}$ ) | $\epsilon$ ( $^1\text{H}$ ) |
|---------------|-------------------------|------------------------------|--------------------------------|---------------------------|-----------------------------|
| 1             | 1                       | 83.68                        | 83.0939                        | 4.59                      | 4.3123                      |
| 2             | 2                       | 54.01                        | 54.0977                        | 3.21                      | 3.1395                      |
| 3             | 4                       | 21.75                        | 21.9505                        | 2.28                      | 2.4558                      |
| 4             | 5                       | 21.75                        | 21.9505                        | 1.76                      | 1.8167                      |
| 5             | 6                       | 27.88                        | 29.3230                        | 2.26                      | 2.2929                      |
| 6             | 7                       | 27.88                        | 29.3230                        | 1.97                      | 2.0708                      |
| 7             | 8                       | 130.40                       | 129.6859                       | 5.84                      | 6.0401                      |
| 8             | 11                      | 54.22                        | 53.9077                        | 3.01                      | 2.9282                      |
| 9             | 12                      | 61.92                        | 64.0458                        | 2.57                      | 2.3502                      |
| 10            | 15                      | 21.59                        | 22.2478                        | 1.79                      | 1.8691                      |
| 11            | 16                      | 22.27                        | 19.9299                        | 1.13                      | 1.0954                      |
| 12            | 17                      | 22.23                        | 20.0244                        | 0.92                      | 0.9591                      |

Table S2. The  $^{13}\text{C}$  chemical shift,  $\delta$ , and shielding,  $\sigma$ , of all carbon atoms of aquatolide, which are numbered as in the Supporting Materials file ‘aquatolide.xyz’. This data set is plotted in Figure S1 (at page S2).

| atom # | $\delta$ , in ppm | $\sigma$ , in ppm |
|--------|-------------------|-------------------|
| 21     | 83.68             | 92.1694           |
| 23     | 54.01             | 123.5897          |
| 5      | 62.05             | 115.0800          |
| 6      | 21.75             | 158.4245          |
| 9      | 27.88             | 150.4356          |
| 12     | 130.40            | 41.6823           |
| 14     | 134.37            | 38.3085           |
| 15     | 211.51            | -42.8888          |
| 16     | 54.22             | 123.7956          |
| 18     | 61.92             | 112.8100          |
| 20     | 41.19             | 134.4311          |
| 4      | 177.18            | -5.1776           |
| 25     | 21.59             | 158.1023          |
| 29     | 22.27             | 160.6140          |
| 33     | 22.23             | 160.5116          |

Table S3. The  $^1\text{H}$  chemical shift,  $\delta$ , and shielding,  $\sigma$ , of all hydrogen atoms of aquatolide, which are numbered as in the Supporting Materials file ‘aquatolide.xyz’. This data set is plotted in Figure S2 (at page S3).

| atom #     | $\delta$ , in ppm | $\sigma$ , in ppm           |
|------------|-------------------|-----------------------------|
| 22         | 4.59              | 27.2982                     |
| 24         | 3.21              | 28.5215                     |
| 7          | 2.28              | 29.2346                     |
| 8          | 1.76              | 29.9012                     |
| 10         | 2.26              | 29.4045                     |
| 11         | 1.97              | 29.6362                     |
| 13         | 5.84              | 25.4960                     |
| 17         | 3.01              | 28.7419                     |
| 19         | 2.57              | 29.3448                     |
| (26,27,28) | 1.79              | (30.0578+30.0500+29.4321)/3 |
| (30,31,32) | 1.13              | (30.6853+30.6600+30.6156)/3 |
| (34,35,36) | 0.92              | (30.7413+30.5898+31.0559)/3 |

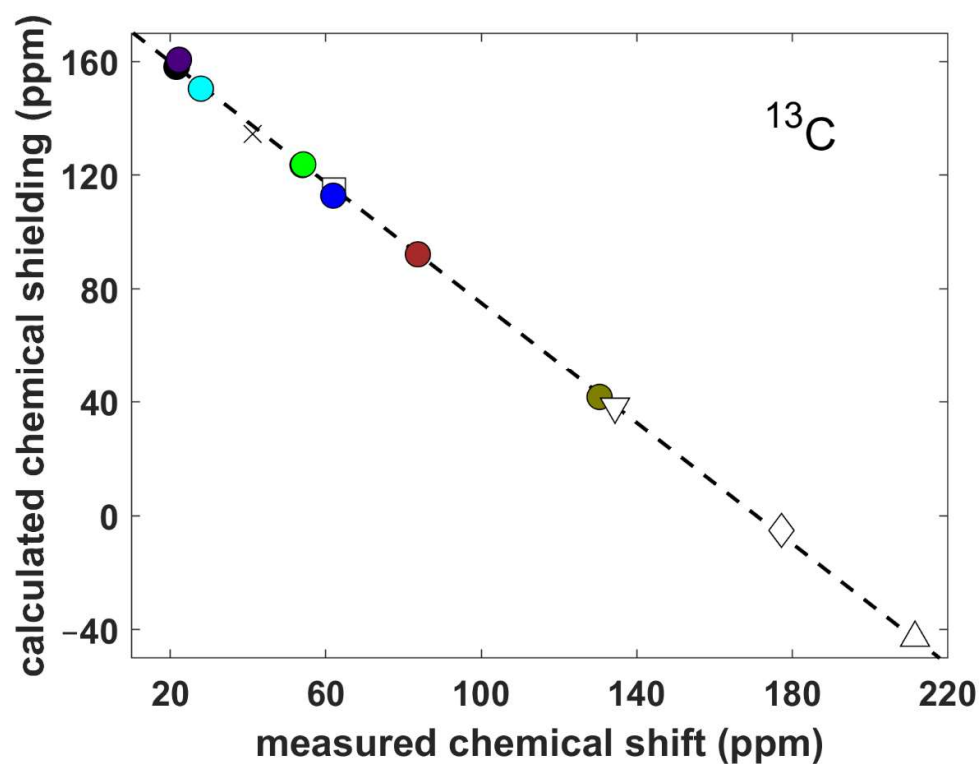

Figure S1. Comparison between theory and experiment for the  $^{13}\text{C}$  chemical shift/shielding data of all carbons of aquatolide in DMSO. The coloring scheme follows the one used in Figure 1 of the main text, and in addition an empty square, downward-pointing triangle, upward-pointing triangle, cross, and diamond symbols are used for the C3, C7 C8, C11, and C12 atoms, respectively. The dashed line is  $y = -1.0609 \cdot x + 181.11$  ppm.

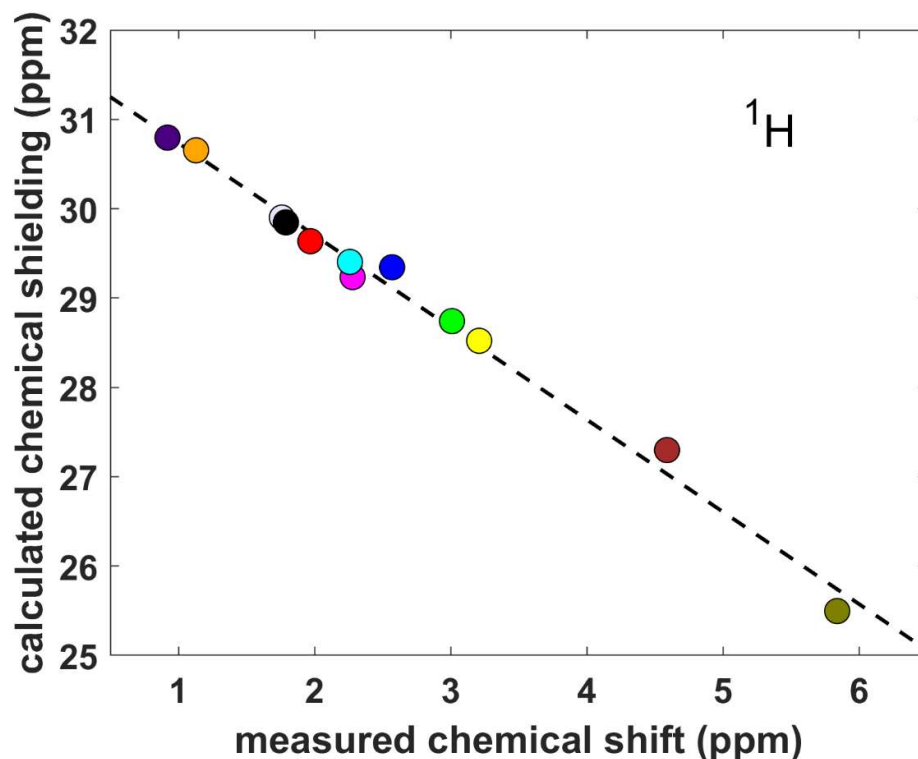

Figure S2. Comparison between theory and experiment for the  $^1\text{H}$  chemical shift/shielding data of all protons of aquatolide in DMSO, which are colored accordingly to Figure 1 of the main text. The dashed line is  $y = -1.0320 \cdot x + 31.767$  ppm.

Table S4. Experimental chemical shifts,  $\delta$ , theoretical chemical shifts,  $\varepsilon$ , and chemical shieldings,  $\sigma$ , of 3,12-di(4-aminophenyl)  $\text{Ni}^{\text{II}}$  dimesitylnorcorrole used to reconstruct its HSQC spectrum in chloroform. The  $\{^{13}\text{C}, ^1\text{H}\}$  sites are designated as in reference [14], and their numbering is provided, which corresponds to the coordinates available as the Supporting Materials ‘diamine.xyz’ file.

| site     | $\delta (^{13}\text{C})$ ,<br>in ppm | $\varepsilon (^{13}\text{C})$ ,<br>in ppm | $\sigma (^{13}\text{C})$ ,<br>in ppm | averaged<br>carbons # | $\delta (^1\text{H})$ ,<br>in ppm | $\varepsilon (^1\text{H})$ ,<br>in ppm | $\sigma (^1\text{H})$ ,<br>in ppm | averaged<br>protons #                   |
|----------|--------------------------------------|-------------------------------------------|--------------------------------------|-----------------------|-----------------------------------|----------------------------------------|-----------------------------------|-----------------------------------------|
| <i>a</i> | 20.580                               | 20.6879                                   | 161.6738                             | 45,91                 | 1.7305                            | 1.6909                                 | 29.9439                           | 64,65,66,78,79,80                       |
| <i>e</i> | 125.823                              | 127.2762                                  | 51.2390                              | 13,31                 | 1.7440                            | 1.7505                                 | 29.8808                           | 50,57                                   |
| <i>f</i> | 115.930                              | 115.6563                                  | 63.2782                              | 18,36                 | 1.8640                            | 1.8599                                 | 29.7649                           | 51,58                                   |
| <i>d</i> | 113.528                              | 112.1498                                  | 66.9113                              | 12,30                 | 1.9020                            | 2.0078                                 | 29.6081                           | 49,56                                   |
| <i>c</i> | 18.019                               | 18.2988                                   | 164.1491                             | 44,46,89,90           | 2.7230                            | 2.6476                                 | 28.9302                           | 61,62,63,67,68,69,<br>72,73,74,75,76,77 |
| <i>g</i> | 125.509                              | 126.6527                                  | 51.8850                              | 7,9,25,27             | 5.3005                            | 5.3836                                 | 26.0312                           | 53,54,93,94                             |
| <i>h</i> | 112.340                              | 111.1777                                  | 67.9185                              | 6,10,24,28            | 5.5865                            | 5.4728                                 | 25.9367                           | 52,55,92,95                             |
| <i>b</i> | 127.687                              | 127.5166                                  | 50.9899                              | 39,41,48,88           | 5.9910                            | 6.0284                                 | 25.3480                           | 59,60,70,71                             |

Figure S3. Reconstructed HSQC spectrum of 3,12-di(4-aminophenyl) Ni<sup>II</sup> dimesitylnorcorrole in chloroform. The experimental and theoretical chemical shifts, which are listed in Table S4 (at page S3), are plotted as circles and diamonds, respectively.

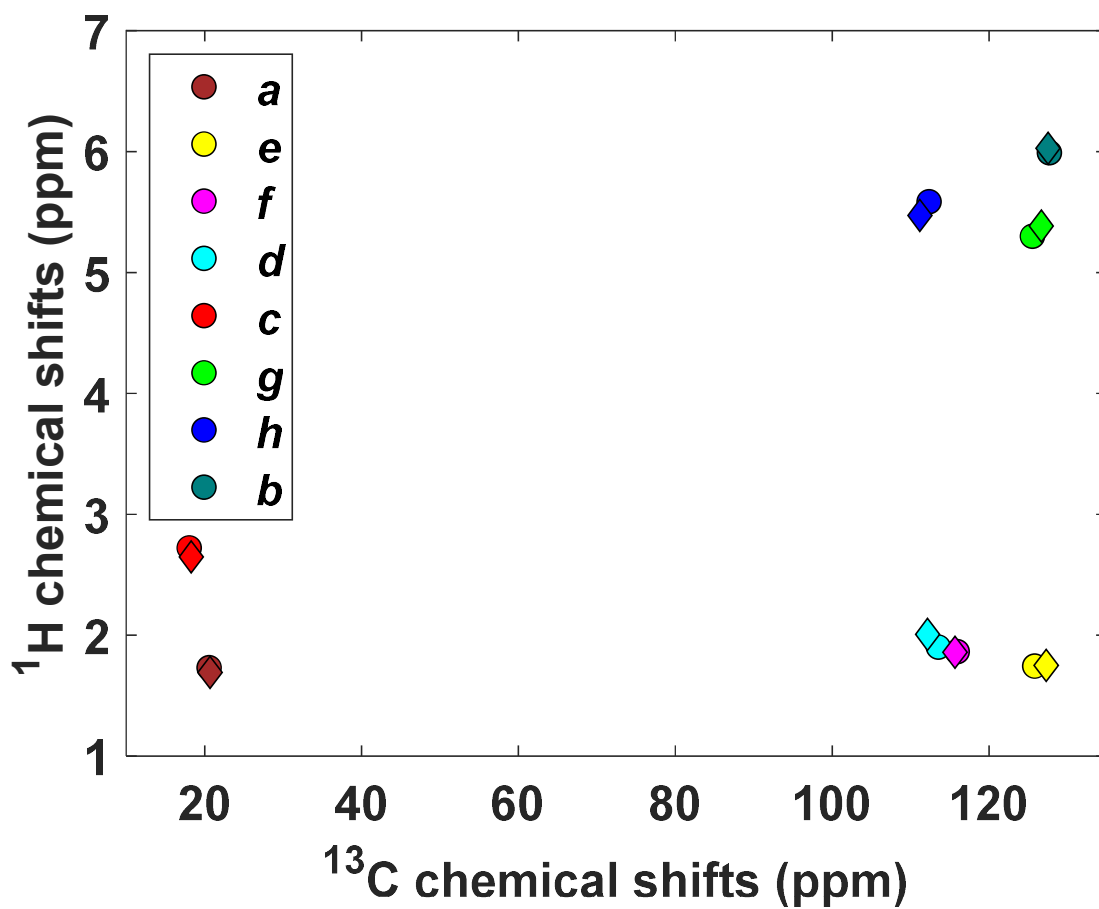

Table S5. The  $^1\text{H}$  NMR parameters of three compounds presented in the main text. The assignment of respective peaks is obtainable from the corresponding author upon request together with output files from the related GIAO-B3LYP-PCM // B3LYP-PCM calculations performed using the 6-311++G(2d,2p) basis set.

| compound                                                                                                                                                                                                                                                               | peak # | # of<br>involved<br>protons | $\delta$ , in ppm | $\sigma$ , in ppm |
|------------------------------------------------------------------------------------------------------------------------------------------------------------------------------------------------------------------------------------------------------------------------|--------|-----------------------------|-------------------|-------------------|
| 3,12-di(4-aminophenyl)<br>$\text{Ni}^{\text{II}}$ dimesitylnorcorrole<br>that is compound <b>2</b><br>from reference [14] of the main text                                                                                                                             | 1      | 3                           | 1.726             | 29.9041           |
|                                                                                                                                                                                                                                                                        | 2      | 3                           | 1.735             | 29.9036           |
|                                                                                                                                                                                                                                                                        | 3      | 2                           | 1.744             | 29.8862           |
|                                                                                                                                                                                                                                                                        | 4      | 2                           | 1.864             | 29.7897           |
|                                                                                                                                                                                                                                                                        | 5      | 1                           | 1.898             | 29.6346           |
|                                                                                                                                                                                                                                                                        | 6      | 1                           | 1.906             | 29.6345           |
|                                                                                                                                                                                                                                                                        | 7      | 12                          | 2.723             | 28.9218           |
|                                                                                                                                                                                                                                                                        | 8      | 4                           | 3.186             | 28.6174           |
|                                                                                                                                                                                                                                                                        | 9      | 2                           | 5.292             | 26.0480           |
|                                                                                                                                                                                                                                                                        | 10     | 2                           | 5.309             | 26.0481           |
|                                                                                                                                                                                                                                                                        | 11     | 2                           | 5.578             | 25.9134           |
|                                                                                                                                                                                                                                                                        | 12     | 2                           | 5.595             | 25.9132           |
|                                                                                                                                                                                                                                                                        | 13     | 4                           | 5.991             | 25.4019           |
| (6,16-Dimesityl-11-oxa-20,21,22,23-tetra-<br>azapentacyclo[15.2.1.1 <sup>2,5</sup> .1 <sup>7,10</sup> .1 <sup>12,15</sup> ]tricos-<br>1(19),2,4,6,8,10(22),12(21),13,15,17-<br>decaenato)-nickel(ii) that is compound <b>3</b><br>from reference [13] of the main text | 1      | 12                          | 1.9741            | 29.7121           |
|                                                                                                                                                                                                                                                                        | 2      | 6                           | 2.4983            | 29.1545           |
|                                                                                                                                                                                                                                                                        | 3      | 4                           | 7.1081            | 24.2775           |
|                                                                                                                                                                                                                                                                        | 4      | 2                           | 7.5604            | 23.8536           |
|                                                                                                                                                                                                                                                                        | 5      | 2                           | 7.5994            | 23.7793           |
|                                                                                                                                                                                                                                                                        | 6      | 1                           | 7.8225            | 23.5770           |
|                                                                                                                                                                                                                                                                        | 7      | 1                           | 7.8314            | 23.5770           |
|                                                                                                                                                                                                                                                                        | 8      | 1                           | 7.8383            | 23.5256           |
|                                                                                                                                                                                                                                                                        | 9      | 1                           | 7.8468            | 23.5256           |
| (6,15-Dimesityl-19,20,21,22-tetra-<br>azapentacyclo[14.2.1.1 <sup>2,5</sup> .1 <sup>7,10</sup> .1 <sup>11,14</sup> ]docosa-<br>-1(19),2,4,6,8,10(21),11,13,15,17-<br>decaenato)-nickel that is compound <b>2</b><br>from reference [13] of the main text               | 1      | 2                           | 1.4704            | 30.1623           |
|                                                                                                                                                                                                                                                                        | 2      | 2                           | 1.4794            | 30.1577           |
|                                                                                                                                                                                                                                                                        | 3      | 2                           | 1.5692            | 29.9834           |
|                                                                                                                                                                                                                                                                        | 4      | 2                           | 1.5777            | 29.9517           |
|                                                                                                                                                                                                                                                                        | 5      | 4                           | 6.2578            | 25.1362           |
|                                                                                                                                                                                                                                                                        | 6      | 6                           | 1.8192            | 29.8515           |
|                                                                                                                                                                                                                                                                        | 7      | 12                          | 2.9003            | 28.7811           |

Table S6. Approximated  $^1\text{H}$  chemical shielding (in ppm) of a proton of coronene in the model from the main text.

| point<br>#     | $x$<br>(in Å) | $y$<br>(in Å) | $z$<br>(in Å) | interpolated by<br>a spline <sup>b</sup> on the<br>5 x 5 x 5 data<br>grid <sup>c</sup> | interpolated by<br>a spline <sup>b</sup> on the<br>9 x 9 x 9 data<br>grid <sup>d</sup> | from the<br>actual<br>calculation <sup>e</sup> |
|----------------|---------------|---------------|---------------|----------------------------------------------------------------------------------------|----------------------------------------------------------------------------------------|------------------------------------------------|
| 1 <sup>a</sup> | 0.06230       | 0.16540       | 0.28300       | 13.9585                                                                                | 13.9623                                                                                | 13.9577                                        |
| 2 <sup>a</sup> | 0.02590       | 0.05290       | 0.01140       | 14.8506                                                                                | 14.8512                                                                                | 14.8981                                        |
| 3 <sup>a</sup> | -0.24920      | -0.16100      | 0.11880       | 12.9092                                                                                | 12.9099                                                                                | 12.9271                                        |

Footnotes to Table S6:

<sup>a</sup> randomly generated

<sup>b</sup> as implemented in “interp3” function of Matlab<sup>®</sup>

<sup>c</sup> the thinner grid with:

```
x = [-0.3 -0.2 -0.1 0.0 +0.1];
y = [-0.2 -0.1 0.0 +0.1 +0.2];
z = [-0.1 0.0 +0.1 +0.2 +0.3];
```

<sup>d</sup> the dense grid with:

```
x = [-0.30 -0.25 -0.20 -0.15 -0.10 -0.05 0.0 +0.05 +0.10];
y = [-0.20 -0.15 -0.10 -0.05 0.0 +0.05 +0.10 +0.15 +0.20];
z = [-0.10 -0.05 0.0 +0.05 +0.10 +0.15 +0.20 +0.25 +0.30];
```

<sup>e</sup> GIAO-B3LYP-SCRF(acetonitrile)/6-311++G(2d,2p)

Table S7. Values of the parameters of equation (1) of the main text (in double precision, as obtained from an application of the Levenberg–Marquardt algorithm implemented in “lsqcurvefit” function of Matlab® Optimization Toolbox).

| parameter | value              |
|-----------|--------------------|
| $a_1$     | −0.003076595181035 |
| $a_2$     | −0.008445862845137 |
| $a_3$     | +0.013363637157717 |
| $a_4$     | −0.001704440669303 |
| $a_5$     | −0.005758757482766 |
| $a_6$     | +0.018211096117826 |
| $a_7$     | −0.002328548611071 |
| $a_8$     | −0.014393382954596 |
| $a_9$     | +0.003682033805506 |
| $a_{10}$  | +8.099764744985144 |

Using these values, the following symmetric matrix was formed to describe the quadratic form from equation (1) of the main text:

$$A = \begin{pmatrix} a_1 & \frac{a_2}{2} & \frac{a_3}{2} & \frac{a_4}{2} \\ \frac{a_2}{2} & a_5 & \frac{a_6}{2} & \frac{a_7}{2} \\ \frac{a_3}{2} & \frac{a_6}{2} & a_8 & \frac{a_9}{2} \\ \frac{a_4}{2} & \frac{a_7}{2} & \frac{a_9}{2} & a_{10} \end{pmatrix}$$

This matrix is considered below.

Table S7: Details of the diagonalization of  $A$  using the Jacobi rotation method (credit: [https://people.sc.fsu.edu/~jburkardt/m\\_src/jacobi\\_eigenvalue/jacobi\\_eigenvalue.html](https://people.sc.fsu.edu/~jburkardt/m_src/jacobi_eigenvalue/jacobi_eigenvalue.html)).

| parameter                        | value              |
|----------------------------------|--------------------|
| the 1st eigenvalue, $\lambda_1$  | −0.023251038464845 |
| the 2nd eigenvalue, $\lambda_2$  | +0.000000692612501 |
| the 3rd eigenvalue, $\lambda_3$  | +0.000020936696243 |
| the 4th eigenvalue, $\lambda_4$  | +8.099765418522848 |
| total number of Jacobi rotations | 14                 |

The trace of  $A$  is 8.076536009366746, while  $\lambda_1 + \lambda_2 + \lambda_3 + \lambda_4$  is 8.076536009366748.

Figure S4. An approximation (shown as red crosses) of the isosurface points (provided by “isosurface” function of Matlab<sup>®</sup> and shown as black open circles; their number is 69) for  $y = 0.2$  Å. It was obtained from equation (1) of the main text by scanning  $x$  at 100 points between  $-0.3$  and  $+0.075$  Å and solving a quadratic equation for the relevant value of  $z$ .

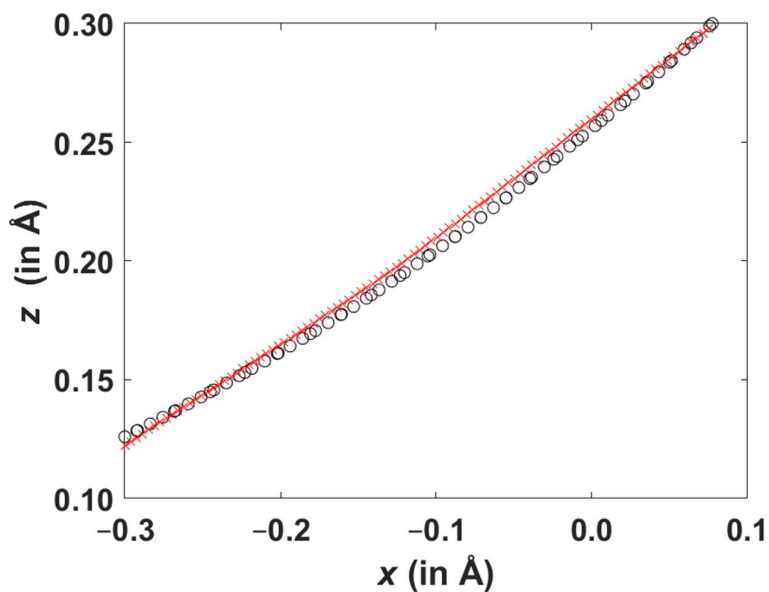

Figure S5. An approximation (shown as red crosses) of the isosurface points (provided by “isosurface” function of Matlab<sup>®</sup> and shown as black open circles; their number is 70) for  $x = -0.3$  Å. It was obtained from equation (1) of the main text by scanning  $y$  at 100 points between  $-0.155$  and  $0.2$  Å and solving a quadratic equation for the relevant value of  $z$ .

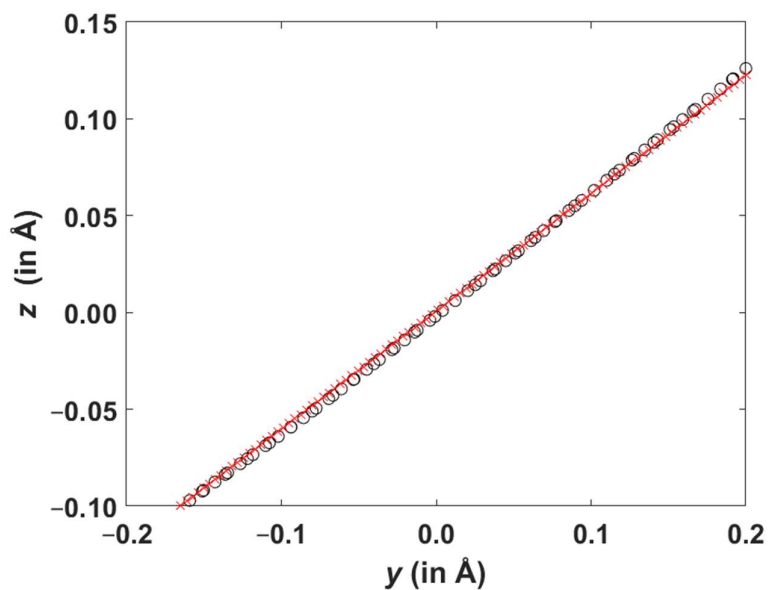

Supplement: s1 [file s1]
